# Supplementary material for: DEM Generation with ICESat-2 Altimetry Data for the Three Antarctic Ice Shelves: Ross, Filchner–Ronne and Amery
Source: MDPI journal article supplement (doi:10.3390/rs13245137), 2021-12-17
Supplement: s1 [file s1]

**Table S1.** Values of mean difference and standard deviation between ICESat-2 RIS DEM as well as the five Antarctic DEMs and OIB elevations as a function of surface slope.

| slope/°  | ICESat-2 |       | TanDEM-X<br>PolarDEM |       | REMA   |       | Slater DEM |       | Helm DEM |       | Bamber DEM |       |
|----------|----------|-------|----------------------|-------|--------|-------|------------|-------|----------|-------|------------|-------|
|          | Mean/m   | Std/m | Mean/m               | Std/m | Mean/m | Std/m | Mean/m     | Std/m | Mean/m   | Std/m | Mean/m     | Std/m |
| 0-0.05   | -0.109   | 1.215 | 5.061                | 1.813 | 0.641  | 1.514 | 0.245      | 1.573 | 0.749    | 1.403 | -0.053     | 1.898 |
| 0.05-0.1 | -0.044   | 1.324 | 5.133                | 2.508 | 0.769  | 2.206 | 0.494      | 2.253 | 0.868    | 2.064 | 0.252      | 2.444 |
| 0.1-0.15 | 0.046    | 1.478 | 5.390                | 3.270 | 0.960  | 2.960 | 0.891      | 2.965 | 0.974    | 2.768 | 0.525      | 3.029 |
| 0.15-0.2 | 0.164    | 1.659 | 6.005                | 3.535 | 1.439  | 3.266 | 1.483      | 3.237 | 1.201    | 3.066 | 0.833      | 3.216 |
| 0.2-0.25 | 0.237    | 1.691 | 6.180                | 3.886 | 1.562  | 3.585 | 1.535      | 3.644 | 1.032    | 3.471 | 0.756      | 3.535 |
| 0.25-0.3 | 0.299    | 1.785 | 6.189                | 4.313 | 1.684  | 3.937 | 1.463      | 4.087 | 0.899    | 4.086 | 0.745      | 3.980 |
| 0.3-0.35 | 0.378    | 1.875 | 6.253                | 4.522 | 1.896  | 4.140 | 1.594      | 4.450 | 0.878    | 4.445 | 0.755      | 4.213 |
| 0.35-0.4 | 0.324    | 1.754 | 6.306                | 4.623 | 1.955  | 4.309 | 1.722      | 4.857 | 0.625    | 5.036 | 0.602      | 4.670 |
| 0.4-0.45 | 0.328    | 1.954 | 6.119                | 4.846 | 1.762  | 4.709 | 1.766      | 5.095 | 0.341    | 5.493 | 0.320      | 5.019 |
| 0.45-0.5 | 0.035    | 2.237 | 5.837                | 5.328 | 1.207  | 4.887 | 1.298      | 5.093 | -0.277   | 5.727 | -0.257     | 5.252 |
| 0.5-0.55 | 0.398    | 2.317 | 5.491                | 5.430 | 0.975  | 4.961 | 0.714      | 5.117 | -0.804   | 5.902 | -0.532     | 5.287 |
| 0.55-0.6 | 0.156    | 2.090 | 5.526                | 5.511 | 0.939  | 4.883 | 0.252      | 5.451 | -1.390   | 6.069 | -1.096     | 5.355 |
| 0.6-0.65 | -0.019   | 2.144 | 4.799                | 6.084 | 0.135  | 5.434 | -0.681     | 5.967 | -2.675   | 6.701 | -2.276     | 5.466 |
| 0.65-0.7 | 0.002    | 2.363 | 4.237                | 6.694 | 0.147  | 5.792 | -1.474     | 6.805 | -3.486   | 7.584 | -2.675     | 6.304 |
| 0.7-0.75 | 0.090    | 2.726 | 3.760                | 6.656 | -0.213 | 5.960 | -1.402     | 6.220 | -3.380   | 6.807 | -3.046     | 5.869 |
| 0.75-0.8 | 0.273    | 1.895 | 5.280                | 6.441 | 1.144  | 5.693 | 0.236      | 6.212 | -1.998   | 6.436 | -1.448     | 5.581 |
| 0.8-0.85 | 0.271    | 2.055 | 4.763                | 6.780 | 1.185  | 6.315 | -0.041     | 6.774 | -2.300   | 7.173 | -1.585     | 6.185 |
| 0.85-0.9 | 0.594    | 1.765 | 4.817                | 6.136 | 1.275  | 5.715 | 0.004      | 5.893 | -2.660   | 6.160 | -1.380     | 5.308 |
| 0.9-0.95 | 0.195    | 2.138 | 1.973                | 8.817 | -1.779 | 7.926 | -2.935     | 8.234 | -5.079   | 8.477 | -3.579     | 6.829 |
| 0.95-1.0 | 0.518    | 2.140 | 3.048                | 6.329 | -0.244 | 5.856 | -1.973     | 6.706 | -3.875   | 7.005 | -2.817     | 6.007 |

**Table S2.** Values of mean difference and standard deviation between ICESat-2 RIS DEM as well as the five Antarctic DEMs and OIB elevations as a function of surface slope.

| slope/°  | ICESat-2 |       | TanDEM-X<br>PolarDEM |       | REMA   |       | Slater DEM |       | Helm DEM |       | Bamber DEM |       |
|----------|----------|-------|----------------------|-------|--------|-------|------------|-------|----------|-------|------------|-------|
|          | Mean/m   | Std/m | Mean/m               | Std/m | Mean/m | Std/m | Mean/m     | Std/m | Mean/m   | Std/m | Mean/m     | Std/m |
| 0-0.05   | -0.506   | 0.635 | 1.979                | 1.259 | -0.899 | 1.652 | 0.040      | 0.674 | 0.209    | 1.923 | -0.289     | 1.014 |
| 0.05-0.1 | -0.657   | 1.123 | 1.923                | 1.786 | -1.662 | 1.932 | -0.155     | 1.142 | -0.658   | 3.326 | -0.695     | 1.834 |
| 0.1-0.15 | -1.138   | 1.627 | 1.114                | 2.569 | -2.741 | 2.251 | -0.476     | 1.741 | -2.157   | 4.124 | -1.665     | 2.782 |
| 0.15-0.2 | -1.098   | 1.564 | 0.893                | 2.803 | -2.803 | 2.387 | -0.214     | 2.195 | -1.988   | 3.269 | -1.498     | 2.741 |
| 0.2-0.25 | -1.349   | 2.135 | 1.075                | 3.128 | -2.613 | 2.992 | 0.047      | 2.745 | -2.941   | 4.607 | -1.284     | 3.125 |
| 0.25-0.3 | -1.496   | 2.332 | 0.364                | 3.354 | -3.486 | 3.403 | 0.720      | 3.217 | -3.551   | 4.265 | -0.659     | 4.810 |
| 0.3-0.35 | -1.559   | 2.600 | 0.425                | 3.498 | -3.196 | 3.600 | 0.864      | 3.674 | -4.479   | 4.883 | 0.007      | 5.166 |
| 0.35-0.4 | -1.904   | 2.775 | 0.564                | 3.597 | -2.639 | 3.774 | 0.347      | 4.025 | -5.423   | 5.502 | -0.404     | 4.643 |
| 0.4-0.45 | -2.125   | 3.590 | 1.030                | 3.886 | -2.292 | 4.361 | 0.390      | 4.833 | -4.728   | 6.020 | -0.237     | 4.713 |
| 0.45-0.5 | -2.021   | 4.184 | 0.953                | 3.984 | -2.533 | 4.749 | 0.244      | 4.747 | -4.519   | 5.736 | -0.603     | 4.307 |
| 0.5-0.55 | -2.197   | 4.909 | 0.879                | 3.892 | -2.230 | 4.658 | 0.242      | 5.571 | -4.615   | 6.328 | -0.952     | 4.335 |
| 0.55-0.6 | -1.060   | 4.579 | 1.953                | 3.863 | -1.120 | 4.110 | 0.922      | 5.504 | -3.632   | 6.625 | -0.506     | 3.778 |
| 0.6-0.65 | -1.791   | 3.721 | 0.621                | 3.913 | -2.328 | 4.761 | 0.190      | 3.646 | -5.078   | 4.794 | -1.282     | 4.470 |
| 0.65-0.7 | -2.710   | 4.622 | 0.357                | 3.897 | -3.052 | 5.785 | -0.627     | 4.907 | -5.880   | 5.963 | -1.002     | 4.650 |
| 0.7-0.75 | -2.860   | 3.811 | 0.597                | 3.270 | -2.855 | 4.846 | 0.132      | 4.201 | -6.135   | 5.220 | -2.613     | 5.149 |
| 0.75-0.8 | -1.738   | 3.637 | 1.155                | 3.280 | -1.222 | 4.066 | 0.515      | 4.037 | -4.916   | 4.865 | -0.949     | 3.784 |
| 0.8-0.85 | -1.320   | 4.928 | 1.943                | 3.668 | -0.360 | 4.638 | -0.208     | 5.878 | -4.465   | 6.242 | 0.487      | 3.249 |
| 0.85-0.9 | -0.941   | 3.984 | 1.925                | 3.879 | -0.276 | 5.231 | 0.456      | 4.855 | -4.099   | 5.487 | 1.118      | 2.643 |
| 0.9-0.95 | -1.676   | 5.850 | 2.591                | 3.358 | -0.088 | 5.198 | -0.738     | 6.889 | -5.082   | 7.512 | 1.125      | 3.026 |
| 0.95-1.0 | -2.002   | 3.762 | 1.366                | 3.414 | -1.284 | 4.824 | -0.393     | 4.540 | -4.727   | 5.318 | 0.718      | 2.067 |
